# Supplementary material for: Immunization with CoronaVac or ChadOx-1 Elicit Distinct Modulation of Monocyte Subtypes and Systemic Inflammatory Status in Older Adults
Source: Research Square preprint supplement (doi:10.21203/rs.3.rs-7085263/v1), 2025-07-15
Supplement: Supplementary file 1 [file 58d0111ed9aff922076980b1.pdf]

## Highlights

- Older adults vaccinated with CoronaVac or ChAdOx-1 showed increased anti-SARS-CoV-2 IgG levels.
- ChAdOx-1 induced higher IgG titers and greater expansion of all monocyte subtypes.
- ChAdOx-1 was associated with a more pro-inflammatory cytokine profile (elevated IL-6/IL-10 and TNF- $\alpha$ /IL-10 ratios).
- CoronaVac promoted a higher post-vaccination IFN- $\gamma$  response.
- Both vaccines modulated monocyte subsets and systemic inflammation differently in older adults.
